# Supplementary material for: Influence of occupational identity on work engagement of non-staff teachers in public kindergartens: the chain-mediating role of perceived organizational support and teaching efficacy
Source: Research Square preprint supplement (doi:10.21203/rs.3.rs-7220242/v1), 2025-09-26
Supplement: Supplementary file 1 [file 03e0d46e365c4eeffbbf8b07.docx]

**Table 1** Demographics of the participants (*N* = 429)

| Characteristics | Categories | N | (%) | Characteristics | Categories | N | (%) |
| --- | --- | --- | --- | --- | --- | --- | --- |
| Gender | Male | 48 | 11.2 | Professional title | Not assessed | 291 | 67.8 |
|  | Female | 381 | 88.8 |  | Elementary teacher level three | 31 | 7.2 |
| Insurance | Insurance | 198 | 46.2 |  | Elementary teacher level two | 49 | 11.4 |
|  | no insurance | 106 | 24.7 |  | Elementary teacher level one | 28 | 6.5 |
|  | other forms | 125 | 29.1 |  | Senior elementary teacher | 8 | 1.9 |
| Age | 25 and below | 118 | 27.5 |  | Other | 22 | 5.1 |
|  | 26-35 | 195 | 45.5 | Teaching age | <5 years | 177 | 41.3 |
|  | 36-45 | 91 | 21.2 |  | 5-10 years | 148 | 34.5 |
|  | Over 45 | 25 | 5.8 |  | >10 years | 104 | 24.2 |
| highest education | Technical secondary school ( high school ) and below | 66 | 15.4 | level of kindergarten | Unrated | 153 | 35.7 |
|  | Junior college | 197 | 45.9 |  | Third-tier Kindergarten | 48 | 11.2 |
|  | Undergraduate | 148 | 34.5 |  | Second-tier Kindergarten | 68 | 15.9 |
|  | Graduate student | 18 | 4.2 |  | First-tier Kindergarten | 76 | 17.7 |
|  |  |  |  |  | Demonstration Kindergarten | 84 | 19.6 |

**Table 2** Descriptive statistics and correlation analysis (N = 429)

|  | M | SD | 1 | 2 | 3 | 4 |
| --- | --- | --- | --- | --- | --- | --- |
| 1.occupational identity | 4.10 | 0.62 | 1 |  |  |  |
| 2.perceived organizational support | 3.82 | 0.83 | 0.477** | 1 |  |  |
| 3.teaching efficacy | 3.19 | 0.39 | 0.234** | 0.244** | 1 |  |
| 4.work engagement | 3.82 | 0.75 | 0.604** | 0.692** | 0.312** | 1 |

**p＜0.01

**Table 3** Regression analysis between variables

| Outcome variable | Predictor variable | β | t | R | R² | F |
| --- | --- | --- | --- | --- | --- | --- |
| perceived organizational support | occupational identity | 0.603 | 10.254*** | 0.548 | 0.30 | 25.793*** |
| teaching efficacy | occupational identity | 0.090 | 2.593** | 0.315 | 0.099 | 5.780*** |
|  | perceived organizational support | 0.071 | 2.766** |  |  |  |
| work engagement | occupational identity | 0.333 | 7.652*** | 0.796 | 0.634 | 80.533*** |
|  | perceived organizational support | 0.460 | 14.213*** |  |  |  |
|  | teaching efficacy | 0.183 | 3.023** |  |  |  |

**Table 4** The effect size of teaching efficacy and perceived organizational support

| Pathways | Effect | BootSE | BootLLCL | BootULCL | Percentage |
| --- | --- | --- | --- | --- | --- |
| Occupational identity→ Perceived organizational support→ Work engagement | 0.277 | 0.04 | 0.202 | 0.359 | 43.62% |
| Occupational identity→ Teaching efficacy→ Work engagement | 0.017 | 0.009 | 0.003 | 0.037 | 2.68% |
| Occupational identity→ Perceived organizational support→ Teaching efficacy→ Work engagement | 0.008 | 0.003 | 0.002 | 0.015 | 1.26% |
| Direct effect | 0.333 | 0.044 | 0.248 | 0.419 | 52.44% |
| indirect effect | 0.302 | 0.041 | 0.225 | 0.385 | 47.56% |
| Total effect | 0.635 | 0.048 | 0.541 | 0.729 | 100% |
